# Supplementary material for: Cardiac resynchronisation therapy is not associated with a reduction in mortality or heart failure hospitalisation in patients with non-left bundle branch block QRS morphology: meta-analysis of randomised controlled trials
Source: HighWire-hosted journal article supplement (doi:10.1136/heartjnl-2014-306811), 2015-02-12
Supplement: heartjnl-2014-306811supp_appendix.pdf [file heartjnl-2014-306811supp_appendix.pdf]

**Appendix 1: Risk of bias table**

| <b>Study</b>        | <b>Random sequence generation</b>                                                                                                                                                                | <b>Allocation concealment</b>                                                                                                                                                                                 | <b>Blinding of participants and personnel</b>                                                                       | <b>Blinding of outcome assessment</b>                                                                                                                              | <b>Incomplete data</b>                                                                                                                                                                                        | <b>Baseline differences</b>                                                |
|---------------------|--------------------------------------------------------------------------------------------------------------------------------------------------------------------------------------------------|---------------------------------------------------------------------------------------------------------------------------------------------------------------------------------------------------------------|---------------------------------------------------------------------------------------------------------------------|--------------------------------------------------------------------------------------------------------------------------------------------------------------------|---------------------------------------------------------------------------------------------------------------------------------------------------------------------------------------------------------------|----------------------------------------------------------------------------|
| MADIT-CRT [5,15,20] | The patients were randomly assigned in a 3:2 ratio with stratification according to clinical centre and ischaemic status with the use of an algorithm that ensured near balance in each stratum. | The random assignment was made by the Coordination and Data Center and transmitted to the enrolling clinical centres by logging on to a Web-based automated program or by telephone with hard copy to follow. | The treating physicians were aware of study-group assignments.                                                      | Adjudication of the end points was carried out by an independent mortality committee and by a heart-failure committee that was unaware of study-group assignments. | A total of 44 patients in the CRT-D group (4.0%) and 55 in the ICD-only group (7.5%) declined to continue participating in the study, were withdrawn by a physician, or were lost to follow-up.               | No significant differences.                                                |
| MIRACLE [3,19]      | Sealed envelopes were used for randomization.                                                                                                                                                    | The participants, treating physicians and study evaluators were unaware of the treatment assignment.                                                                                                          | Neither the patients nor the physicians treating them for HF and performing the study evaluations were aware of the | Ascertainment of clinical outcomes unclear.                                                                                                                        | No patient was lost to follow-up for the analysis of death or worsening HF. In the control group, 24 did not complete 6 months follow up because of heart transplant, complications related to the device and | Similar with respect to age, gender, ethnicity, and NYHA functional class. |

|                |                                                                                                                                                                                                             |                |                                 |                                                                                          |                                                                                                                                                     |                                                                                                   |
|----------------|-------------------------------------------------------------------------------------------------------------------------------------------------------------------------------------------------------------|----------------|---------------------------------|------------------------------------------------------------------------------------------|-----------------------------------------------------------------------------------------------------------------------------------------------------|---------------------------------------------------------------------------------------------------|
|                |                                                                                                                                                                                                             |                | treatment assignment.           |                                                                                          | missed visit. In the cardiac resynchronization group 13 did not complete 6 month follow up because of death or complications related to the device. |                                                                                                   |
| CARE-HF [1,18] | Randomization was stratified according to the NYHA class and was carried out by Quintiles by an independent clinical-research organisation which maintained the database and used a minimization procedure. | Not blinded.   | Not blinded.                    | The members of the end-points committee were unaware of patients' treatment assignments. | No loss to follow up for survival status.                                                                                                           | The baseline demographic, clinical, and ECG characteristics of the two study groups were similar. |
| COMPANION [2]  | Randomly assigned in a 1:2:2 ratio.                                                                                                                                                                         | Not blinded.   | Not blinded.                    | End-points committee were unaware of the treatment assignments.                          | 26% withdrew in the OMT arm as CRT had become commercially available.                                                                               | No significant difference.                                                                        |
| RAFT [4,12]    | Randomly assigned in a 1:1                                                                                                                                                                                  | Not specified. | The participants and the health | Not specified.                                                                           | Five patients (0.6%) in the ICD group either                                                                                                        | No significant difference.                                                                        |

|                |                                                                                                                                     |                                                                                                               |                                                                                                                                                                          |                                                                                                                        |                                                                                                                                                                         |                                                                                                                                                                                 |
|----------------|-------------------------------------------------------------------------------------------------------------------------------------|---------------------------------------------------------------------------------------------------------------|--------------------------------------------------------------------------------------------------------------------------------------------------------------------------|------------------------------------------------------------------------------------------------------------------------|-------------------------------------------------------------------------------------------------------------------------------------------------------------------------|---------------------------------------------------------------------------------------------------------------------------------------------------------------------------------|
|                | ratio with stratification according to clinical centre, atrial rhythm, and a planned implantation of a single- or dual-chamber ICD. |                                                                                                               | care providers were unaware of assignments. Only the arrhythmia team that performed the device implantation and device management were aware of study-group assignments. |                                                                                                                        | withdrew (4 patients) or were lost to follow-up (1 patient); 10 patients (1.1%) in the CRT-D group either withdrew (8 patients) or were lost to follow-up (2 patients). |                                                                                                                                                                                 |
| REVERSE [6,14] | Randomization occurred in permuted blocks within centers.                                                                           | During randomized phase, patients were randomized to their assignment and treatment was blinded to personnel. | During randomized phase, patients were randomized to their assignment and treatment was blinded to personnel.                                                            | An unblinded independent Data Monitoring Committee reviewed all adverse events, hospitalizations and mortality events. | Three patients the QRS morphology was unknown.                                                                                                                          | Differences were present between LBBB and non-LBBB for gender, ischemia, diabetes, intrinsic QRS duration, interventricular mechanical delay, 6-min hall walk, CRT-D implanted. |
