# Supplementary material for: Cardiac resynchronisation therapy is not associated with a reduction in mortality or heart failure hospitalisation in patients with non-left bundle branch block QRS morphology: meta-analysis of randomised controlled trials
Source: HighWire-hosted journal article supplement (doi:10.1136/heartjnl-2014-306811), 2015-02-12
Supplement: heartjnl-2014-306811supp_figure.pdf [file heartjnl-2014-306811supp_figure.pdf]

## Supplementary Figure 1

Graph showing the effect of trial start year on death

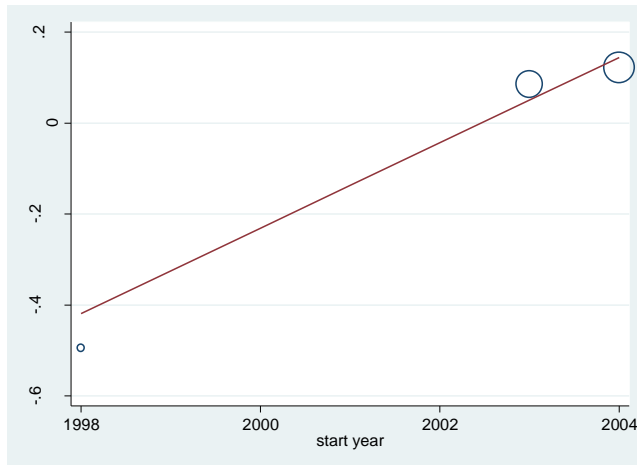

**exp(b) (95%CI): 1.10 (0.24-4.95), p=0.573, n=3**

Graph showing the effect of trial start year on HF

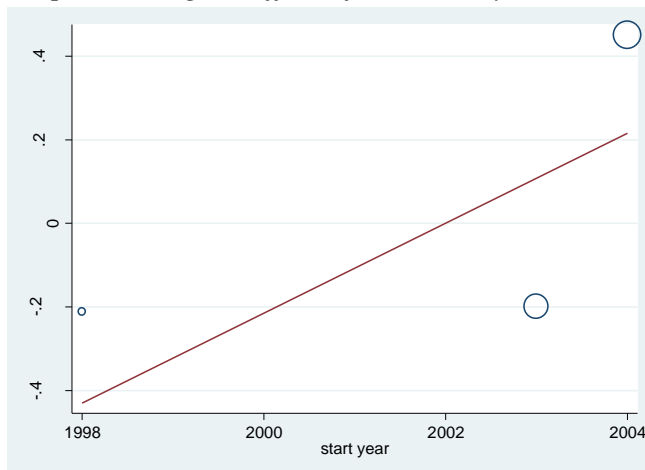

**exp(b) (95%CI): 1.11 (0.16-7.95), p=0.613, n=3**

Graph showing the effect of trial start year on HF or death

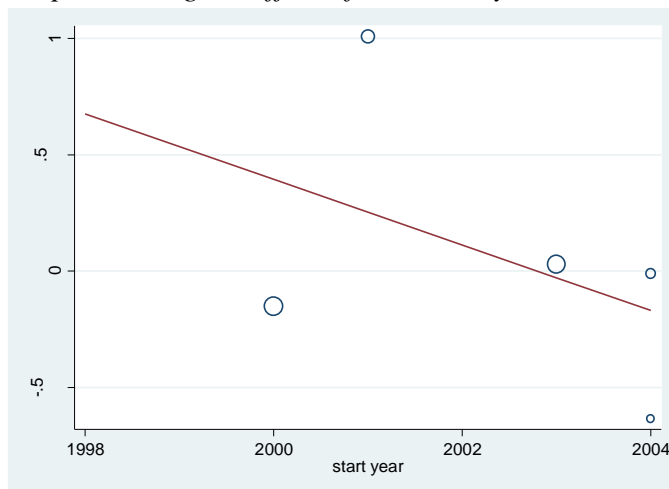

**exp(b) (95%CI): 0.87 (0.50-1.49), p=0.469, n=5**

Graph showing the effect of trial mean year on death

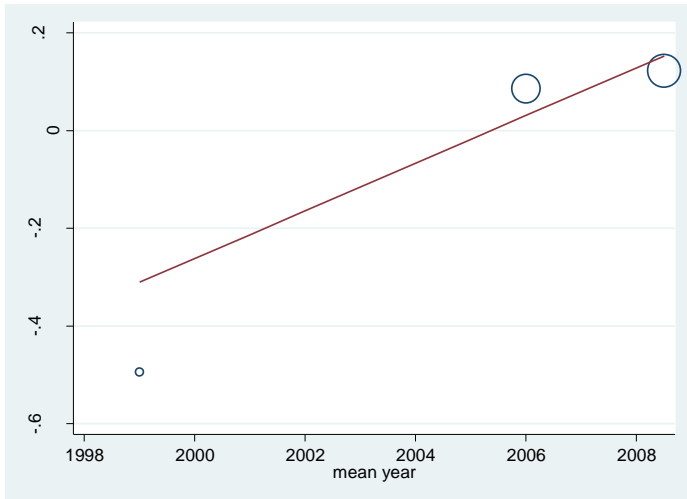

**exp(b) (95%CI): 1.05 (0.44-2.49), p=0.603, n=3**

Graph showing the effect of trial mean year on HF

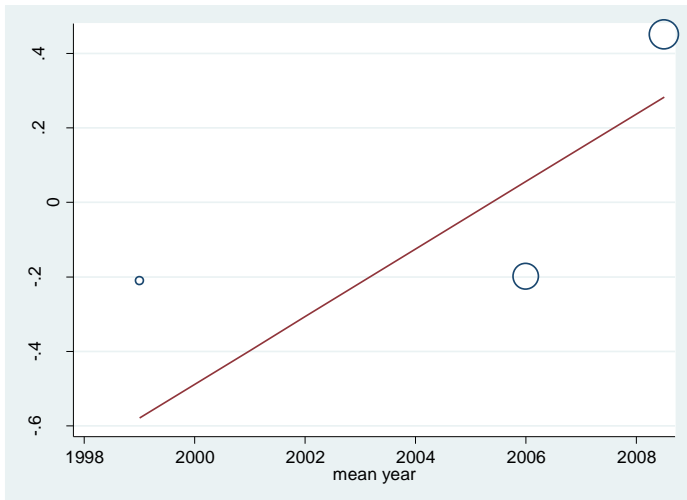

**exp(b) (95%CI): 1.10 (0.35-3.44), p=0.498, n=3**

Graph showing the effect of trial mean year on HF or death

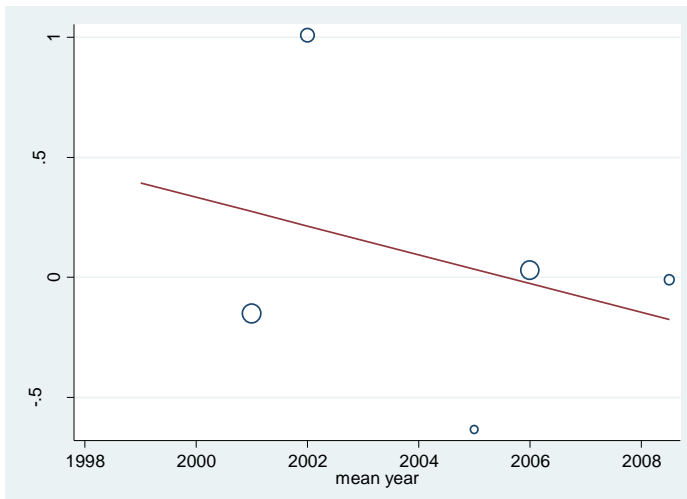

**exp(b) (95%CI): 0.94 (0.67-1.32), p=0.612, n=5**
